# Supplementary material
Source: HighWire-hosted journal article supplement (http://www.cmaj.ca/highwire/filestream/68792/field_highwire_adjunct_files/0/170508-case-1-at.pdf)
Supplement: 170508-case-1-at.pdf [file 170508-case-1-at.pdf]

**Appendix 1:** Rates of confirmed *Neisseria gonorrhoeae* infection and disseminated gonococcal infection reported to Public Health Ontario, 2011–2016.

| <b>Rates of confirmed <i>Neisseria gonorrhoeae</i> infection and disseminated gonococcal infection reported to Public Health Ontario, 2011–2016.*</b> |                                               |                                                            |                                                                 |                                                                          |
|-------------------------------------------------------------------------------------------------------------------------------------------------------|-----------------------------------------------|------------------------------------------------------------|-----------------------------------------------------------------|--------------------------------------------------------------------------|
| <b>Year</b>                                                                                                                                           | <b>Confirmed cases of gonorrhea infection</b> | <b>Rates of gonorrhea infection per 100 000 population</b> | <b>Confirmed cases of gonorrhea with disseminated infection</b> | <b>Rates of disseminated gonococcal infection per 100 000 population</b> |
| 2011                                                                                                                                                  | 4205                                          | 31.7                                                       | 2                                                               | 0.02                                                                     |
| 2012                                                                                                                                                  | 4097                                          | 30.6                                                       | 6                                                               | 0.04                                                                     |
| 2013                                                                                                                                                  | 4542                                          | 33.5                                                       | 3                                                               | 0.02                                                                     |
| 2014                                                                                                                                                  | 5840                                          | 42.7                                                       | 0                                                               | 0.00                                                                     |
| 2015                                                                                                                                                  | 5938                                          | 43.0                                                       | 4                                                               | 0.03                                                                     |
| 2016                                                                                                                                                  | 6755                                          | 48.5                                                       | 1                                                               | 0.01                                                                     |

\*Data extracted from the Integrated Public Health Information System database by Public Health Ontario. Rates based on population estimates of the Ontario Ministry of Health and Long-Term Care.
